# Supplementary material for: Bottom-up synthesis strategy of a two-dimensional {Fe5} cluster-based coordination polymer: stepwise formation of a {Fe5} cluster and its dimension augmentation
Source: Royal Society of Chemistry journal article supplement (doi:10.1039/d1qi01333e), 2021-11-30
Supplement: d1qi01333e1.pdf [file d1qi01333e1.pdf]

## Supporting Information

# Bottom-up Synthesis Strategy of Two-dimensional {Fe<sub>5</sub>} Cluster-Based Coordination Polymer : Stepwise Formation of {Fe<sub>5</sub>} Cluster and Its Dimension Augmentation

Ye Tao, <sup>#a</sup> Huang-Fei Qin, <sup>#a</sup> Zhi-Rong Hu, <sup>a</sup> Zhao-Ting Pan, <sup>a</sup> Peng-Fei Yao, <sup>\*ab</sup> He-Dong Bian, <sup>ac</sup> Di Yao, <sup>a</sup> Xiao-Huan Qin, <sup>\*a</sup> and Fu-Ping Huang <sup>\*a</sup>

<sup>a</sup> State Key Laboratory for the Chemistry and Molecular Engineering of Medicinal Resources, School of Chemistry and Pharmaceutical Sciences, Guangxi Normal University, Guilin 541004, P. R. China. E-mail: huangfp2010@163.com; [chengqinshi@hotmail.com](mailto:chengqinshi@hotmail.com)

<sup>b</sup> College of Chemistry and Environmental Engineering, Baise University, Baise, Guangxi 533000, P. R. China. E-mail: yaopengfei1986@163.com

<sup>c</sup> Key Laboratory of Development and Application of Forest Chemicals of Guangxi, Guangxi University of Nationalities, Nanning 530006, P. R. China.

## Experimental

### Materials and methods

Except for the ligands which were prepared according to the literature procedure,<sup>1</sup> the other chemicals were commercial products and were used without any further purification. Elemental analyses for C, H, and N were performed on a Perkin-Elmer 2400II elemental analyzer. The Fourier transform infrared data were obtained on a Perkin-Elmer Spectrum One FT-IR spectrometer. Powder X-ray diffraction was measured on a Rigaku D/max diffractometer equipped (Cu-K $\alpha$ ,  $\lambda = 1.54056 \text{ \AA}$ ). XPS spectra were measured by Electron spectrometer ESCALAB 250Xi. A FEI Quanta 200 scanning electron microscope (SEM) was used to determine the morphology. HRESI-MS measurements were conducted on a Thermo Exactive instrument at a capillary temperature of 275 K. A aliquots of the solution were injected into the device at 0.3 mL/h. And the data were collected in positive ion mode. The spectrometer had previously been calibrated with standard tune mix to give a precision of about 2 ppm in the region of  $m/z$  300-2000; the tube lens voltage was set at 150 V and the skimmer voltage at 25 V. The in-source energy was set to a range of 0-100 eV with a gas flow rate at 10% of the maximum.

### Synthesis of $[\text{Fe}^{\text{III}}_4\text{Fe}^{\text{II}}\text{O}_2\text{Cl}_4(\text{Hdpbt})_4] \cdot [\text{Fe}^{\text{III}}\text{Cl}_4]_2 \cdot 4.5\text{MeOH}$ ( $\{\text{Fe}_5\}$ -0D).

A mixture of  $\text{H}_2\text{dpbt}$  (0.30 mmol, 0.0912 g),  $\text{FeCl}_3 \cdot 6\text{H}_2\text{O}$  (1 mmol, 0.2703 g) were added in 10 mL  $\text{MeOH}/2$ -butanol (V:V=9:1). The mixture was stirred at room temperature for 20min. The resulting reaction mixture was sealed in a Teflon-lined stainless steel vessel (25 mL) and maintained at 100 °C for 24h at 10 °C/h. Brown-black block crystals were obtained. they were picked out, washed with ethanol, and dried in air (yield ca. 57% based on  $\text{Fe}^{\text{III}}$ ). Anal. Calcd for  $\text{C}_{56}\text{H}_{44}\text{Cl}_{13}\text{Fe}_7\text{N}_{32}\text{O}_6$ : C, 30.39; H, 2.00; N, 20.25. Found: C, 35.22; H, 2.06; N, 20.33. IR (KBr,  $\text{cm}^{-1}$ ): 3405(s), 3093(w), 2841(m), 2692(w), 1611(w), 1567(m), 1460(w), 1422(w), 1396(m), 1309(s), 1287(s), 1182(w), 1158(w), 1097(w), 1072(w), 1054(m), 1034(w), 1015(m), 1004(w), 979(w), 795(w), 751(w), 718(s), 686(s), 639(m), 634(m), 496(m).

### Synthesis of $\{[\text{Fe}^{\text{III}}_4\text{Fe}^{\text{II}}\text{O}_2\text{Cl}_5(\text{dpbt})_2(\text{Hdpbt})_2] \cdot (\text{Fe}^{\text{III}}\text{Cl}_4) \cdot 6\text{MeOH}\}_n$ ( $\{\text{Fe}_5\}$ -1D)

*Method 1.* As-synthesized  $\{\text{Fe}_5\}$ -0D (ca. 25 mg of single crystals),  $\text{FeCl}_3 \cdot 6\text{H}_2\text{O}$  (0.054 g, 0.2 mmol) were added in a 5 mL  $\text{MeOH}/2$ -butanol (V:V=9:1) solution were stirred (10 min) in a Teflon-lined stainless steel vessel and placed under autogenous pressure at 170 °C for 24h. Brown-black strip crystals were obtained. Anal. Calcd for  $\text{C}_{56}\text{H}_{38}\text{Cl}_9\text{Fe}_7\text{N}_{32}\text{O}_5$ : C, 35.51; H, 1.97; N, 23.00. Found: C, 35.83; H, 1.98; N, 22.81. IR (KBr,  $\text{cm}^{-1}$ ): 3405(s), 3093(s), 2841(s), 2692(m), 1611(s), 1567(m), 1460(s), 1422(s), 1396(s), 1353(w), 1309(s),

1287(s), 1182(m), 1097(m), 1073(m), 1054(m), 1034(m), 1015(m), 1005(m), 979(m), 900(w), 795(s), 752(s), 719(s), 686(s), 639(m), 634(m), 497(w).

*Method 2.* As-synthesized **{Fe<sub>5</sub>}-0D** (ca. 25 mg of single crystals), FeCl<sub>3</sub>·6H<sub>2</sub>O (0.054 g, 0.2 mmol), and triethylamine (0.2ml) were added in a 5 mL MeOH/2-butanol (V:V=9:1) solution were stirred (10 min) in a Teflon-lined stainless steel vessel and placed under autogenous pressure at 100 °C for 24h.

#### Synthesis of $\{[\text{Fe}^{\text{III}}_4\text{Fe}^{\text{II}}_3\text{O}_2\text{Cl}_5(\text{dpbt})_4(\text{H}_2\text{O})_{1.5}(\text{MEK})_{0.5}]\cdot(\text{Fe}^{\text{III}}\text{Cl}_4)\cdot 8.5\text{MeOH}\}_n$ (**{Fe<sub>5</sub>}-2D**)

*Method 1.* As-synthesized **{Fe<sub>5</sub>}-0D** (ca. 25 mg of single crystals) and FeCl<sub>3</sub>·6H<sub>2</sub>O (0.054 g, 0.2 mmol) in a 5 mL MeOH/2-butanol (V:V=9:1) solution were stirred (10 min) in a Teflon-lined stainless steel vessel and placed under autogenous pressure at 170 °C for 24h. The resulting black block crystals of **{Fe<sub>5</sub>}-2D** in a yield of about 21% (based on **{Fe<sub>5</sub>}-0D**) were obtained. Yield: 45%. Anal. Calcd for C<sub>55</sub>H<sub>44</sub>Cl<sub>9</sub>Fe<sub>8</sub>N<sub>32</sub>O<sub>6.5</sub>: C, 33.83; H, 2.15; N, 21.77. Found: C, 34.02; H, 2.17; N, 21.59. IR (KBr, cm<sup>-1</sup>): 3375(s), 1611(w), 1462(m), 1438(w), 1425(w), 1399(m), 1295(w), 1155(w), 1097(m), 1034(s), 1004(s), 794(w), 752(w), 722(w), 681(w), 631(m), 519(m).

*Method 2.* As-synthesized **{Fe<sub>5</sub>}-0D** (ca. 25 mg of single crystals), FeCl<sub>3</sub>·6H<sub>2</sub>O (0.054 g, 0.2 mmol), and triethylamine (0.6ml) were added in a 5 mL MeOH/2-butanol (V:V=9:1) solution were stirred (10 min) in a Teflon-lined stainless steel vessel and placed under autogenous pressure at 100 °C for 24h.

#### X-ray crystallographic analysis

Single crystal X-ray diffraction data collection for **{Fe<sub>5</sub>}-0D**, **{Fe<sub>5</sub>}-1D** and **{Fe<sub>5</sub>}-2D** were conducted on an Agilent Supernova diffractometer (Mo, λ = 0.71073Å) at room temperature. The crystal structures were solved using direct methods with the SHELXL program<sup>2, 3</sup> and refined with a full-matrix least-squares technique within the ShelXL and OLEX2.<sup>4</sup> All the non-hydrogen atoms were refined anisotropically. All H atoms were refined isotropically. Since the solvent molecules in the complex were obviously disordered, they could not be modeled correctly. Thus, the Solvent Mask procedure implemented in OLEX2 software was employed to calculate the diffraction contribution of the solvent molecules and thereby produce a set of solvent-free diffraction intensities. The Mask results for the complexes are provided in the Supporting Information. The crystallographic and refinement details are presented in **Table S5**. Selected bond lengths and bond angle are given in **Table S6**. CCDC reference numbers: 2112792-2112794.†

#### References:

1. F. P. Huang, P. F. Yao, H. Y. Li, Q. Yu, H. D. Bian and H. Liang, *Chem Commun*, 2015, **51**, 7598-7601.
2. G. M. Sheldrick, *Acta Crystallogr A*, 2008, **64**, 112-122.
3. G. M. Sheldrick, *Acta Crystallogr C Struct Chem*, 2015, **71**, 3-8.
4. O. V. Dolomanov, L. J. Bourhis, R. J. Gildea, J. A. K. Howard and H. Puschmann, *Journal of Applied Crystallography*, 2009, **42**, 339-341.

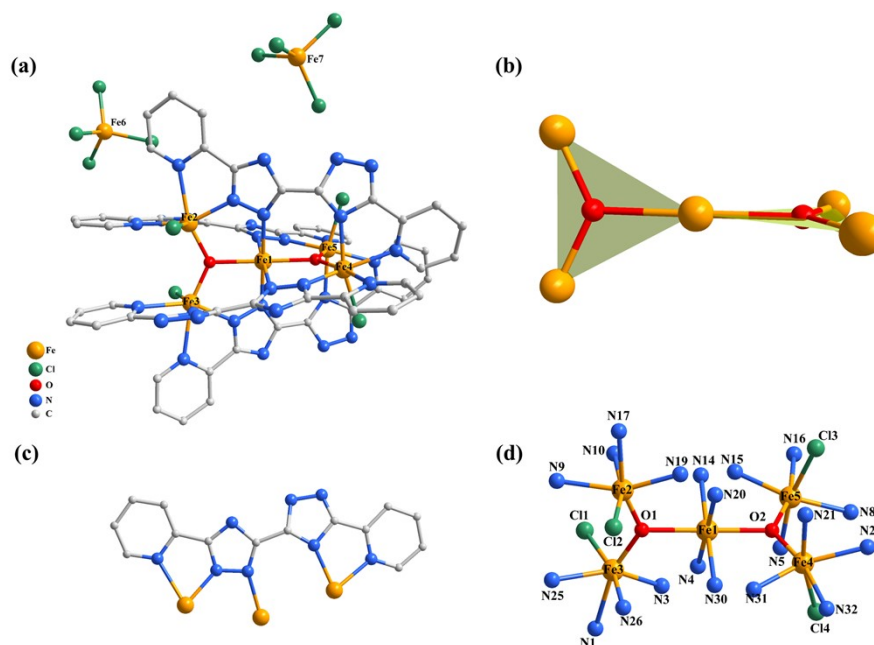

**Fig. S1** The structure and [Fe<sub>3</sub>] core of {Fe<sub>3</sub>}-0D (a, b). Coordination mode of Hdpbt ligand (c). Coordination environments of five crystallographically independent Fe ions in {Fe<sub>3</sub>}-0D (d).

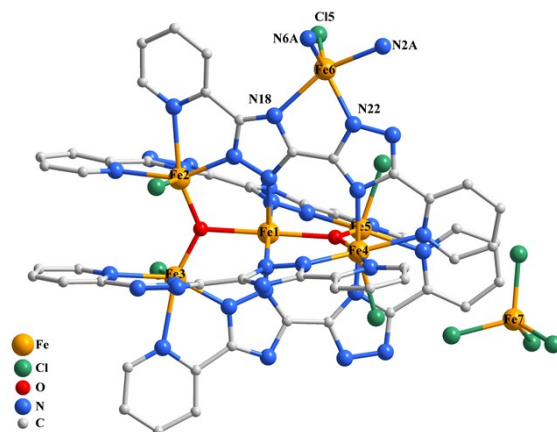

**Fig. S2** Coordination environments of Fe ions in {Fe<sub>3</sub>}-1D.

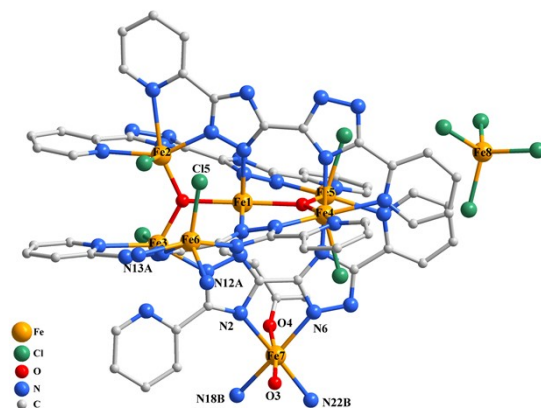

Fig. S3 Coordination environments of Fe ions in {Fe<sub>5</sub>}-2D.

Table S1. SHAPE analysis of the Fe ions in {Fe<sub>5</sub>}-0D, {Fe<sub>5</sub>}-1D and {Fe<sub>5</sub>}-2D

| Coordination modes   |                       | FeN <sub>4</sub> O <sub>2</sub>                                                   | FeN <sub>4</sub> OCl                                                              | FeN <sub>4</sub> Cl                                                               | FeN <sub>4</sub> O <sub>2</sub>                                                     | FeCl <sub>4</sub>                                                                   |
|----------------------|-----------------------|-----------------------------------------------------------------------------------|-----------------------------------------------------------------------------------|-----------------------------------------------------------------------------------|-------------------------------------------------------------------------------------|-------------------------------------------------------------------------------------|
|                      |                       | 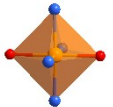 |  |  |  |  |
| label symmetry shape |                       | OC-6<br>Oh<br>Octahedron                                                          | OC-6<br>Oh<br>Octahedron                                                          | TBPY-5<br>D3h<br>Trigonal bipyramid                                               | OC-6<br>Oh<br>Octahedron                                                            | T-4<br>Td<br>Tetrahedron                                                            |
| Calculation results  |                       | distortion( $\tau_{\min}$ )                                                       |                                                                                   |                                                                                   |                                                                                     |                                                                                     |
| Serial number        | {Fe <sub>5</sub> }-0D | Fe1 (0.022)                                                                       | Fe2 (2.482),<br>Fe3 (2.467),<br>Fe4 (2.529),<br>Fe5 (2.559)                       | -                                                                                 | -                                                                                   | Fe6 (0.005),<br>Fe7 (0.026)                                                         |
|                      | {Fe <sub>5</sub> }-1D | Fe1(0.085)                                                                        | Fe2 (2.908),<br>Fe3 (2.321),<br>Fe4 (2.223),<br>Fe5 (2.620)                       | Fe6 (2.523)                                                                       | -                                                                                   | Fe7 (0.031)                                                                         |
|                      | {Fe <sub>5</sub> }-2D | Fe1 (0.007)                                                                       | Fe2 (2.475),<br>Fe3 (2.740),<br>Fe4 (2.514),<br>Fe5 (2.458)                       | Fe6 (2.154)                                                                       | Fe7 (2.098)                                                                         | Fe8(0.034)                                                                          |

Table S2. Bond Valence Sum (BVS)<sup>a</sup>, Calculations for Fe Atoms in {Fe<sub>5</sub>}-0D, {Fe<sub>5</sub>}-1D and {Fe<sub>5</sub>}-2D.

| Complex | {Fe <sub>5</sub> }-0D |              | {Fe <sub>5</sub> }-1D |              | {Fe <sub>5</sub> }-2D |              |
|---------|-----------------------|--------------|-----------------------|--------------|-----------------------|--------------|
|         | Fe(II)                | Fe(III)      | Fe(II)                | Fe(III)      | Fe(II)                | Fe(III)      |
| Fe1     | <b>1.84</b>           | 2.048        | <b>1.883</b>          | 2.100        | <b>1.948</b>          | 2.168        |
| Fe2     | 2.594                 | <b>2.866</b> | 2.551                 | <b>2.816</b> | 2.563                 | <b>2.831</b> |
| Fe3     | 2.459                 | <b>2.716</b> | 2.616                 | <b>2.888</b> | 2.567                 | <b>2.836</b> |
| Fe4     | 2.571                 | <b>2.839</b> | 2.557                 | <b>2.826</b> | 2.571                 | <b>2.841</b> |

|     |       |              |              |              |              |              |
|-----|-------|--------------|--------------|--------------|--------------|--------------|
| Fe5 | 2.527 | <u>2.792</u> | 2.621        | <u>2.895</u> | 2.579        | <u>2.850</u> |
| Fe6 | 2.884 | <u>3.128</u> | <u>2.037</u> | 2.277        | <u>1.923</u> | 2.149        |
| Fe7 | 2.879 | <u>3.122</u> | 2.933        | <u>3.181</u> | <u>1.893</u> | 2.323        |
| Fe8 |       |              |              |              | 3.084        | <u>3.345</u> |

<sup>a</sup> The underlined value is the one closest to the charge for which it was calculated. The oxidation state is the nearest whole number to the underlined value

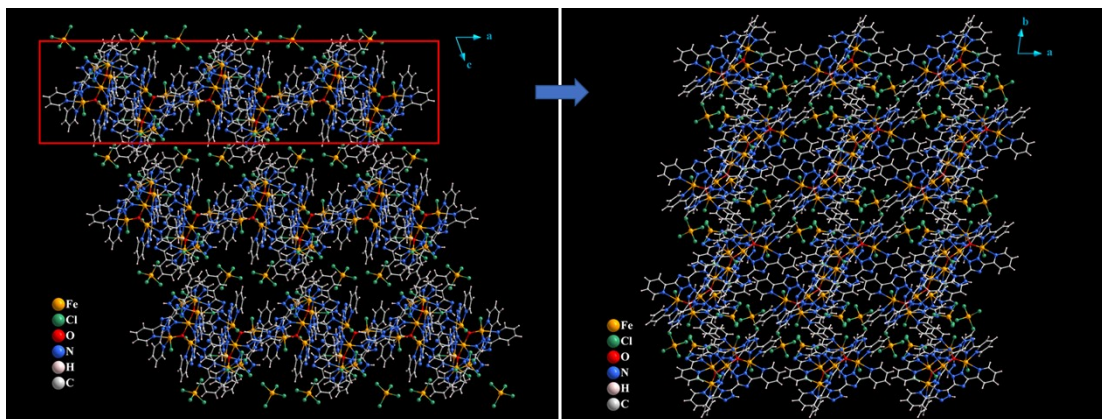

Fig. S4 The packing arrangement of  $\{\text{Fe}_5\}$ -0D along the b-axis and c-axis respectively.

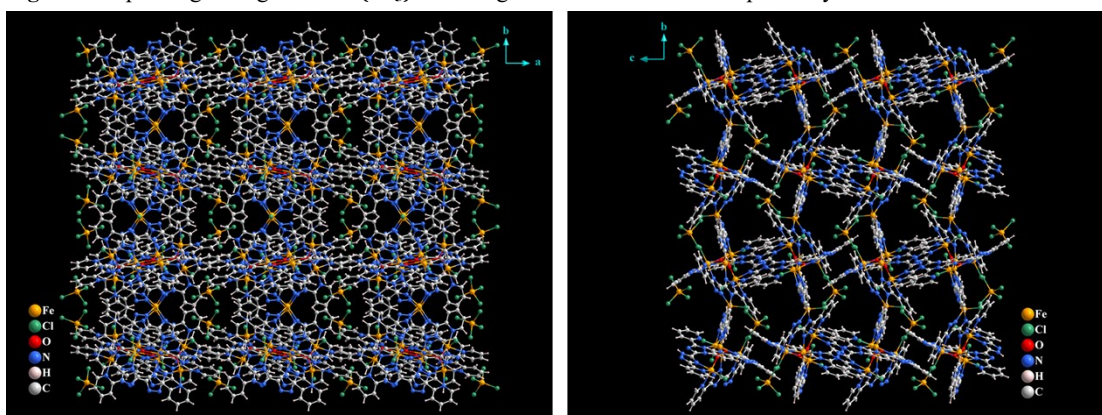

Fig. S5 The packing arrangement of  $\{\text{Fe}_5\}$ -1D along the c-axis and a-axis respectively.

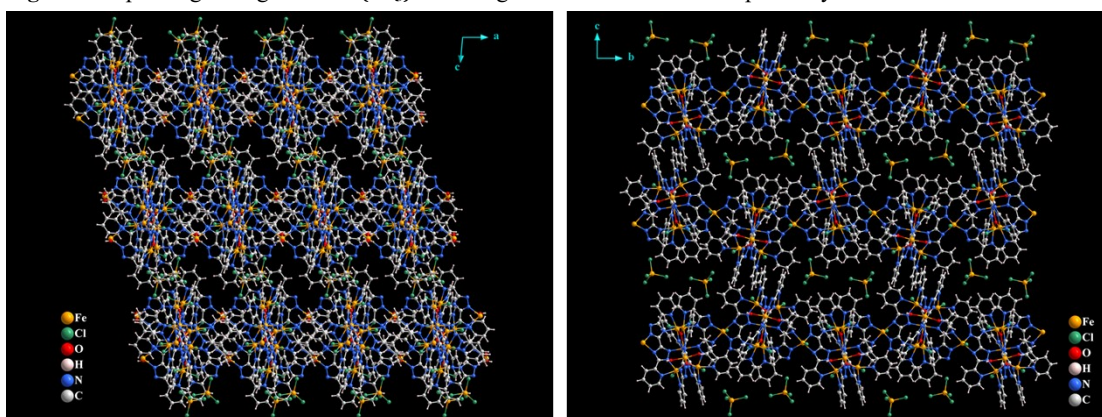

Fig. S6 The packing arrangement of  $\{\text{Fe}_5\}$ -2D along the b-axis and a-axis respectively.

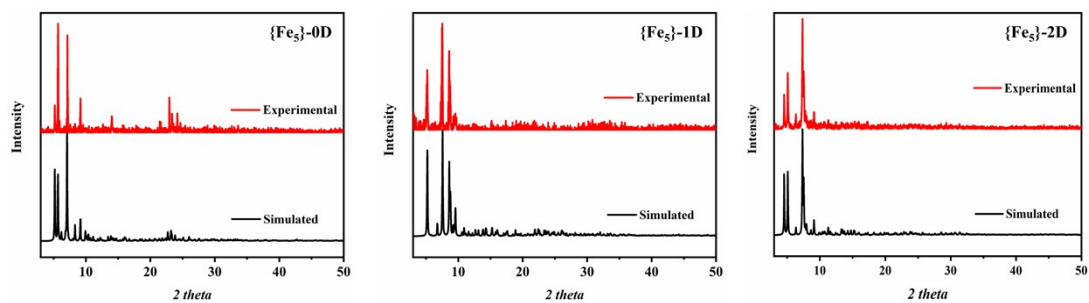

Fig. S7 Powdered X-ray diffraction (PXRD) patterns for  $\{\text{Fe}_5\}$ -0D,  $\{\text{Fe}_5\}$ -1D and  $\{\text{Fe}_5\}$ -2D.

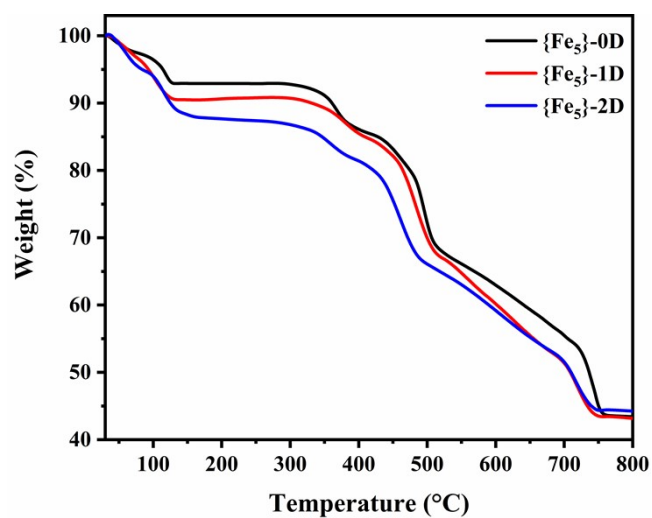

Fig. S8 The TGA plot of  $\{\text{Fe}_5\}$ -0D,  $\{\text{Fe}_5\}$ -1D and  $\{\text{Fe}_5\}$ -2D..

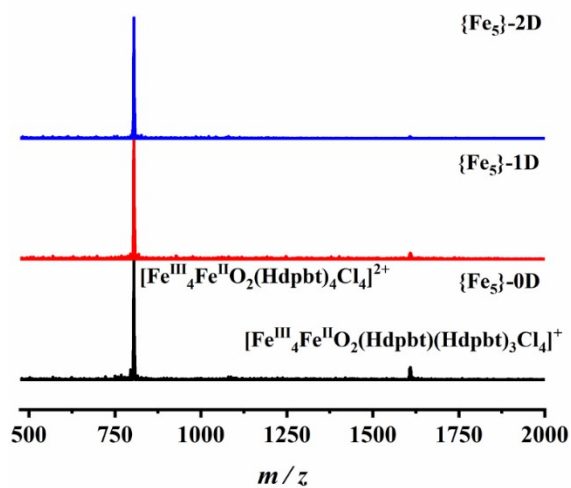



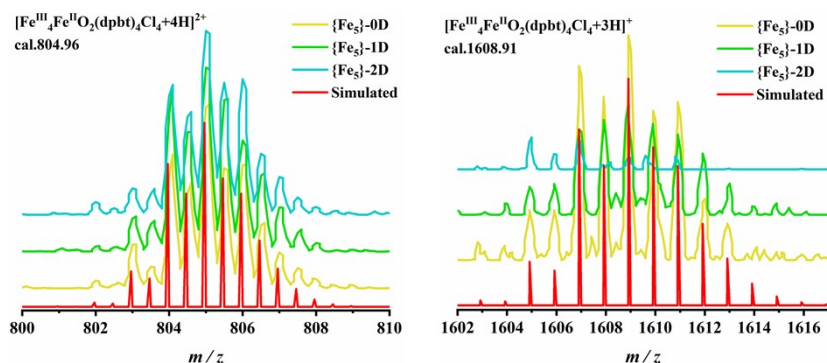

**Fig. S9** Positive HRESI-MS spectra of  $\{\text{Fe}_5\}$ -0D,  $\{\text{Fe}_5\}$ -1D, and  $\{\text{Fe}_5\}$ -2D precursor in MeOH (In-Source CID = 0 eV) and schematic diagram of the  $\{\text{Fe}_5\}$  cluster structure.

**Table S3.** Major species assigned in the HRESI-MS in positive mode.

| $\{\text{Fe}_5\}$ (In-Source CID 0 eV)                                                               |                    |                |                  |
|------------------------------------------------------------------------------------------------------|--------------------|----------------|------------------|
| Peaks                                                                                                | Relative Intensity |                |                  |
| Typical Composition                                                                                  | Intensity          | Observed $m/z$ | Calculated $m/z$ |
| $[\text{Fe}^{\text{II}}_3(\text{dpbt})_2]^{2+}$                                                      | 0.011              | 371.99         | 371.99           |
| $[\text{Fe}^{\text{II}}_3(\text{dpbt})_2(\text{H}_2\text{O})]^{2+}$                                  | 0.051              | 381.00         | 381.00           |
| $[\text{Fe}^{\text{II}}_4\text{O}_2(\text{dpbt})_2+2\text{H}]^{2+}$                                  | 0.22               | 416.96         | 416.96           |
| $[\text{Fe}^{\text{III}}_4\text{Fe}^{\text{II}}\text{O}_2(\text{dpbt})_4\text{Cl}_4+4\text{H}]^{2+}$ | 1                  | 804.96         | 804.96           |
| $[\text{Fe}^{\text{III}}_4\text{Fe}^{\text{II}}\text{O}_2(\text{dpbt})_4\text{Cl}_4+3\text{H}]^+$    | 0.0339             | 1608.91        | 1608.91          |
| $\{\text{Fe}_5\}$ (In-Source CID 40 eV)                                                              |                    |                |                  |
| $[\text{Fe}^{\text{II}}_3(\text{dpbt})_2]^{2+}$                                                      | 0.021              | 371.99         | 371.99           |
| $[\text{Fe}^{\text{II}}_3(\text{dpbt})_2(\text{H}_2\text{O})]^{2+}$                                  | 0.103              | 381.00         | 381.00           |
| $[\text{Fe}^{\text{II}}_4\text{O}_2(\text{dpbt})_2+2\text{H}]^{2+}$                                  | 1.14               | 416.96         | 416.96           |
| $[\text{Fe}^{\text{III}}_3\text{Fe}^{\text{II}}\text{O}(\text{dpbt})_3\text{Cl}]^{2+}$               | 0.129              | 569.48         | 569.48           |
| $[\text{Fe}^{\text{III}}_4\text{Fe}^{\text{II}}\text{O}_2(\text{dpbt})_3\text{Cl}_2]^{2+}$           | 0.123              | 622.93         | 622.93           |
| $[\text{Fe}^{\text{III}}_4\text{Fe}^{\text{II}}\text{O}_2(\text{dpbt})_4\text{Cl}+\text{H}]^{2+}$    | 0.191              | 750.00         | 750.00           |
| $[\text{Fe}^{\text{III}}_4\text{Fe}^{\text{II}}\text{O}_2(\text{dpbt})_4\text{Cl}_4+4\text{H}]^{2+}$ | 1                  | 804.96         | 804.96           |
| $[\text{Fe}^{\text{III}}_3\text{Fe}^{\text{II}}\text{O}(\text{dpbt})_3\text{Cl}]^+$                  | 0.0298             | 1138.96        | 1138.97          |
| $[\text{Fe}^{\text{III}}_3\text{Fe}^{\text{II}}\text{O}_2(\text{dpbt})_3\text{Cl}+\text{H}]^+$       | 0.0379             | 1155.96        | 1155.97          |
| $[\text{Fe}^{\text{III}}_3\text{Fe}^{\text{II}}\text{O}(\text{dpbt})_3\text{Cl}_2]^+$                | 0.0323             | 1173.94        | 1173.93          |
| $[\text{Fe}^{\text{III}}_4\text{Fe}^{\text{II}}\text{O}_2(\text{dpbt})_3\text{Cl}_3]^+$              | 0.0732             | 1280.83        | 1280.83          |
| $[\text{Fe}^{\text{III}}_4\text{Fe}^{\text{II}}\text{O}_2(\text{dpbt})_4\text{Cl}_4+3\text{H}]^+$    | 0.114              | 1608.91        | 1608.91          |
| $\{\text{Fe}_5\}$ (In-Source CID 60 eV)                                                              |                    |                |                  |
| $[\text{Fe}^{\text{II}}(\text{Hdpbt})(\text{H}_2\text{O})]^+$                                        | 0.0521             | 363.04         | 363.04           |
| $[\text{Fe}^{\text{II}}_3(\text{dpbt})_2]^{2+}$                                                      | 0.122              | 371.99         | 371.99           |
| $[\text{Fe}^{\text{II}}_3(\text{dpbt})_2(\text{H}_2\text{O})]^{2+}$                                  | 0.219              | 381.00         | 381.00           |
| $[\text{Fe}^{\text{II}}_3(\text{dpbt})_2(\text{CH}_3\text{OH})]^{2+}$                                | 0.0223             | 388.00         | 388.00           |
| $[\text{Fe}^{\text{II}}_4\text{O}(\text{dpbt})_2]^{2+}$                                              | 0.0323             | 407.95         | 407.95           |
| $[\text{Fe}^{\text{II}}_4\text{O}_2(\text{dpbt})_2+2\text{H}]^{2+}$                                  | 0.113              | 416.96         | 416.96           |
| $[\text{Fe}^{\text{II}}_4\text{O}(\text{dpbt})_2(\text{CH}_3\text{OH})]^{2+}$                        | 0.0232             | 423.96         | 423.97           |



|                                                                                                      |        |         |         |
|------------------------------------------------------------------------------------------------------|--------|---------|---------|
| $[\text{Fe}^{\text{III}}_2\text{Fe}^{\text{II}}\text{O}(\text{dpbt})_3]^{2+}$                        | 0.108  | 552.00  | 552.00  |
| $[\text{Fe}^{\text{III}}_4\text{O}_2(\text{dpbt})_3]^{2+}$                                           | 0.0488 | 560.01  | 560.00  |
| $[\text{Fe}^{\text{III}}_3\text{Fe}^{\text{II}}\text{O}(\text{dpbt})_3\text{Cl}]^{2+}$               | 0.369  | 569.48  | 569.48  |
| $[\text{Fe}^{\text{III}}_2\text{Fe}^{\text{II}}_3\text{O}_2(\text{dpbt})_3]^{2+}$                    | 0.0193 | 587.97  | 587.97  |
| $[\text{Fe}^{\text{III}}_3\text{Fe}^{\text{II}}_2\text{O}_2(\text{dpbt})_3\text{Cl}]^{2+}$           | 0.102  | 605.45  | 605.45  |
| $[\text{Fe}^{\text{III}}_4\text{Fe}^{\text{II}}\text{O}_2(\text{dpbt})_3\text{Cl}_2]^{2+}$           | 0.311  | 622.93  | 622.93  |
| $[\text{Fe}^{\text{III}}_4\text{Fe}^{\text{II}}\text{O}_2(\text{dpbt})_4]^{2+}$                      | 0.119  | 732.00  | 732.00  |
| $[\text{Fe}^{\text{III}}_4\text{Fe}^{\text{II}}\text{O}_2(\text{dpbt})_4\text{Cl}+\text{H}]^{2+}$    | 0.357  | 750.00  | 750.00  |
| $[\text{Fe}^{\text{III}}_4\text{Fe}^{\text{II}}\text{O}(\text{dpbt})_4\text{Cl}_2]^{2+}$             | 0.102  | 758.98  | 758.98  |
| $[\text{Fe}^{\text{III}}_4\text{Fe}^{\text{II}}\text{O}_2(\text{dpbt})_4\text{Cl}_2+2\text{H}]^{2+}$ | 0.0893 | 767.98  | 767.98  |
| $[\text{Fe}^{\text{III}}_4\text{Fe}^{\text{II}}\text{O}_2(\text{dpbt})_4\text{Cl}_4+4\text{H}]^{2+}$ | 1      | 804.96  | 804.96  |
| $[\text{Fe}^{\text{III}}\text{Fe}^{\text{II}}_2(\text{dpbt})_3]^+$                                   | 0.0687 | 1032.06 | 1032.07 |
| $[\text{Fe}^{\text{III}}_3\text{Fe}^{\text{II}}\text{O}(\text{dpbt})_3\text{Cl}]^+$                  | 0.302  | 1138.96 | 1138.97 |
| $[\text{Fe}^{\text{III}}_3\text{Fe}^{\text{II}}_2\text{O}_2(\text{dpbt})_3\text{Cl}_2]^+$            | 0.134  | 1245.85 | 1245.86 |
| $[\text{Fe}^{\text{III}}_4\text{Fe}^{\text{II}}\text{O}_2(\text{dpbt})_3\text{Cl}_3]^+$              | 0.222  | 1280.83 | 1280.83 |
| $[\text{Fe}^{\text{III}}_4\text{Fe}^{\text{II}}\text{O}_2(\text{dpbt})_4\text{Cl}]^+$                | 0.0394 | 1498.97 | 1498.98 |
| $[\text{Fe}^{\text{III}}_4\text{Fe}^{\text{II}}\text{O}_2(\text{dpbt})_4\text{Cl}_2+\text{H}]^+$     | 0.0402 | 1534.96 | 1534.96 |
| $[\text{Fe}^{\text{III}}_4\text{Fe}^{\text{II}}\text{O}_2(\text{dpbt})_4\text{Cl}_3+2\text{H}]^+$    | 0.0193 | 1572.93 | 1572.93 |
| $[\text{Fe}^{\text{III}}_4\text{Fe}^{\text{II}}\text{O}_2(\text{dpbt})_4\text{Cl}_4+3\text{H}]^+$    | 0.134  | 1608.91 | 1608.91 |
| {Fe <sub>5</sub> } (In-Source CID 80 eV)                                                             |        |         |         |
| $[\text{Fe}^{\text{II}}(\text{Hdpbt})(\text{H}_2\text{O})]^+$                                        | 0.153  | 363.04  | 363.04  |
| $[\text{Fe}^{\text{II}}_3(\text{dpbt})_2]^{2+}$                                                      | 0.462  | 371.99  | 371.99  |
| $[\text{Fe}^{\text{II}}_3(\text{dpbt})_2(\text{H}_2\text{O})]^{2+}$                                  | 0.292  | 381.00  | 381.00  |
| $[\text{Fe}^{\text{II}}_3(\text{dpbt})_2(\text{CH}_3\text{OH})]^{2+}$                                | 0.0792 | 388.00  | 388.00  |
| $[\text{Fe}^{\text{II}}_4\text{O}(\text{dpbt})_2]^{2+}$                                              | 0.109  | 407.95  | 407.95  |
| $[\text{Fe}^{\text{II}}_4\text{O}_2(\text{dpbt})_2+2\text{H}]^{2+}$                                  | 0.362  | 416.96  | 416.96  |
| $[\text{Fe}^{\text{II}}_4\text{O}(\text{dpbt})_2(\text{CH}_3\text{OH})]^{2+}$                        | 0.0641 | 423.96  | 423.97  |
| $[\text{Fe}^{\text{III}}_2\text{Fe}^{\text{II}}\text{O}(\text{dpbt})_3]^{2+}$                        | 0.237  | 552.00  | 552.00  |
| $[\text{Fe}^{\text{III}}_4\text{O}_2(\text{dpbt})_3]^{2+}$                                           | 0.0796 | 560.01  | 560.00  |
| $[\text{Fe}^{\text{III}}_3\text{Fe}^{\text{II}}\text{O}(\text{dpbt})_3\text{Cl}]^{2+}$               | 0.503  | 569.48  | 569.48  |
| $[\text{Fe}^{\text{III}}_2\text{Fe}^{\text{II}}_3\text{O}_2(\text{dpbt})_3]^{2+}$                    | 0.0564 | 587.97  | 587.97  |
| $[\text{Fe}^{\text{III}}_3\text{Fe}^{\text{II}}_2\text{O}_2(\text{dpbt})_3\text{Cl}]^{2+}$           | 0.106  | 605.45  | 605.45  |
| $[\text{Fe}^{\text{III}}_4\text{Fe}^{\text{II}}\text{O}_2(\text{dpbt})_3\text{Cl}_2]^{2+}$           | 0.292  | 622.93  | 622.93  |
| $[\text{Fe}^{\text{III}}_4\text{Fe}^{\text{II}}\text{O}_2(\text{dpbt})_4]^{2+}$                      | 0.0504 | 732.00  | 732.00  |
| $[\text{Fe}^{\text{III}}_4\text{Fe}^{\text{II}}\text{O}_2(\text{dpbt})_4\text{Cl}+\text{H}]^{2+}$    | 0.193  | 750.00  | 750.00  |
| $[\text{Fe}^{\text{III}}_4\text{Fe}^{\text{II}}\text{O}(\text{dpbt})_4\text{Cl}_2]^{2+}$             | 0.0698 | 758.98  | 758.98  |
| $[\text{Fe}^{\text{III}}_4\text{Fe}^{\text{II}}\text{O}_2(\text{dpbt})_4\text{Cl}_2+2\text{H}]^{2+}$ | 0.0423 | 767.98  | 767.98  |
| $[\text{Fe}^{\text{III}}_4\text{Fe}^{\text{II}}\text{O}_2(\text{dpbt})_4\text{Cl}_4+4\text{H}]^{2+}$ | 0.544  | 804.96  | 804.96  |
| $[\text{Fe}^{\text{III}}\text{Fe}^{\text{II}}_2(\text{dpbt})_3]^+$                                   | 0.233  | 1032.06 | 1032.07 |
| $[\text{Fe}^{\text{III}}_2\text{Fe}^{\text{II}}\text{O}(\text{dpbt})_3\text{Cl}]^+$                  | 1      | 1138.96 | 1138.97 |
| $[\text{Fe}^{\text{III}}_3\text{Fe}^{\text{II}}\text{O}_2(\text{dpbt})_3(\text{CH}_3\text{O})]^+$    | 0.0823 | 1151.02 | 1151.01 |
| $[\text{Fe}^{\text{III}}_3\text{Fe}^{\text{II}}\text{O}_2(\text{dpbt})_2(\text{Hdpbt})\text{Cl}]^+$  | 0.283  | 1155.96 | 1155.97 |
| $[\text{Fe}^{\text{III}}_3\text{Fe}^{\text{II}}\text{O}(\text{dpbt})_3\text{Cl}_2]^+$                | 0.211  | 1173.94 | 1173.93 |

|                                                                                                      |        |         |         |
|------------------------------------------------------------------------------------------------------|--------|---------|---------|
| $[\text{Fe}^{\text{III}}_3\text{Fe}^{\text{II}}_2\text{O}_2(\text{dpbt})_3\text{Cl}_2]^+$            | 0.328  | 1245.85 | 1245.86 |
| $[\text{Fe}^{\text{III}}_4\text{Fe}^{\text{II}}\text{O}_2(\text{dpbt})_3\text{Cl}_3]^+$              | 0.614  | 1280.83 | 1280.83 |
| $[\text{Fe}^{\text{III}}_4\text{Fe}^{\text{II}}\text{O}_2(\text{dpbt})_4\text{Cl}]^+$                | 0.0606 | 1498.97 | 1498.98 |
| $[\text{Fe}^{\text{III}}_4\text{Fe}^{\text{II}}\text{O}_2(\text{dpbt})_4\text{Cl}_2+\text{H}]^+$     | 0.0721 | 1534.96 | 1534.96 |
| $[\text{Fe}^{\text{III}}_4\text{Fe}^{\text{II}}\text{O}_2(\text{dpbt})_4\text{Cl}_3+2\text{H}]^+$    | 0.0413 | 1572.93 | 1572.93 |
| $[\text{Fe}^{\text{III}}_4\text{Fe}^{\text{II}}\text{O}_2(\text{dpbt})_4\text{Cl}_4+3\text{H}]^+$    | 0.0347 | 1608.91 | 1608.91 |
| {Fe <sub>5</sub> } (In-Source CID 100 eV)                                                            |        |         |         |
| $[\text{Fe}^{\text{II}}(\text{Hdpbt})(\text{H}_2\text{O})]^+$                                        | 0.217  | 363.04  | 363.04  |
| $[\text{Fe}^{\text{II}}_3(\text{dpbt})_2]^{2+}$                                                      | 1      | 371.99  | 371.99  |
| $[\text{Fe}^{\text{II}}_3(\text{dpbt})_2(\text{H}_2\text{O})]^{2+}$                                  | 0.423  | 381.00  | 381.00  |
| $[\text{Fe}^{\text{II}}_3(\text{dpbt})_2(\text{CH}_3\text{OH})]^{2+}$                                | 0.183  | 388.00  | 388.00  |
| $[\text{Fe}^{\text{II}}_4\text{O}(\text{dpbt})_2]^{2+}$                                              | 0.129  | 407.95  | 407.95  |
| $[\text{Fe}^{\text{II}}_4\text{O}_2(\text{dpbt})_2+2\text{H}]^{2+}$                                  | 0.417  | 416.96  | 416.96  |
| $[\text{Fe}^{\text{II}}_4\text{O}(\text{dpbt})_2(\text{CH}_3\text{OH})]^{2+}$                        | 0.0589 | 423.96  | 423.97  |
| $[\text{Fe}^{\text{III}}_2\text{Fe}^{\text{II}}_2\text{O}(\text{dpbt})_3]^{2+}$                      | 0.362  | 552.00  | 552.00  |
| $[\text{Fe}^{\text{III}}_4\text{O}_2(\text{dpbt})_3]^{2+}$                                           | 0.139  | 560.01  | 560.00  |
| $[\text{Fe}^{\text{III}}_3\text{Fe}^{\text{II}}\text{O}(\text{dpbt})_3\text{Cl}]^{2+}$               | 0.501  | 569.48  | 569.48  |
| $[\text{Fe}^{\text{III}}_2\text{Fe}^{\text{II}}_3\text{O}_2(\text{dpbt})_3]^{2+}$                    | 0.104  | 587.97  | 587.97  |
| $[\text{Fe}^{\text{III}}_3\text{Fe}^{\text{II}}_2\text{O}_2(\text{dpbt})_3\text{Cl}]^{2+}$           | 0.166  | 605.45  | 605.45  |
| $[\text{Fe}^{\text{III}}_4\text{Fe}^{\text{II}}\text{O}_2(\text{dpbt})_3\text{Cl}_2]^{2+}$           | 0.267  | 622.93  | 622.93  |
| $[\text{Fe}^{\text{III}}_4\text{Fe}^{\text{II}}\text{O}_2(\text{dpbt})_4]^{2+}$                      | 0.0815 | 732.00  | 732.00  |
| $[\text{Fe}^{\text{III}}_4\text{Fe}^{\text{II}}(\text{O})_2(\text{dpbt})_4\text{Cl}+\text{H}]^{2+}$  | 0.119  | 750.00  | 750.00  |
| $[\text{Fe}^{\text{III}}_4\text{Fe}^{\text{II}}\text{O}(\text{dpbt})_4\text{Cl}_2]^{2+}$             | 0.0476 | 758.98  | 758.98  |
| $[\text{Fe}^{\text{III}}_4\text{Fe}^{\text{II}}\text{O}_2(\text{dpbt})_4\text{Cl}_2+2\text{H}]^{2+}$ | 0.0131 | 767.98  | 767.98  |
| $[\text{Fe}^{\text{III}}_4\text{Fe}^{\text{II}}\text{O}_2(\text{dpbt})_4\text{Cl}_4+4\text{H}]^{2+}$ | 0.104  | 804.96  | 804.96  |
| $[\text{Fe}^{\text{III}}\text{Fe}^{\text{II}}_2(\text{dpbt})_3]^+$                                   | 0.157  | 1032.06 | 1032.07 |
| $[\text{Fe}^{\text{III}}_2\text{Fe}^{\text{II}}_2(\text{O})(\text{dpbt})_3\text{Cl}]^+$              | 0.579  | 1138.96 | 1138.97 |
| $[\text{Fe}^{\text{III}}_3\text{Fe}^{\text{II}}\text{O}_2(\text{dpbt})_3(\text{CH}_3\text{O})]^+$    | 0.0467 | 1151.02 | 1151.01 |
| $[\text{Fe}^{\text{III}}_3\text{Fe}^{\text{II}}\text{O}_2(\text{dpbt})_3\text{Cl}+\text{H}]^+$       | 0.103  | 1155.96 | 1155.97 |
| $[\text{Fe}^{\text{III}}_3\text{Fe}^{\text{II}}\text{O}(\text{dpbt})_3\text{Cl}_2]^+$                | 0.0916 | 1173.94 | 1173.93 |
| $[\text{Fe}^{\text{III}}_3\text{Fe}^{\text{II}}_2\text{O}_2(\text{dpbt})_3\text{Cl}_2]^+$            | 0.223  | 1245.85 | 1245.86 |
| $[\text{Fe}^{\text{III}}_4\text{Fe}^{\text{II}}\text{O}_2(\text{dpbt})_3\text{Cl}_3]^+$              | 0.328  | 1280.83 | 1280.83 |
| $[\text{Fe}^{\text{III}}_4\text{Fe}^{\text{II}}\text{O}_2(\text{dpbt})_4\text{Cl}]^+$                | 0.175  | 1498.97 | 1498.98 |
| $[\text{Fe}^{\text{III}}_4\text{Fe}^{\text{II}}\text{O}_2(\text{dpbt})_4\text{Cl}_2+\text{H}]^+$     | 0.139  | 1534.96 | 1534.96 |
| $[\text{Fe}^{\text{III}}_4\text{Fe}^{\text{II}}\text{O}_2(\text{dpbt})_4\text{Cl}_3+2\text{H}]^+$    | 0.0697 | 1572.93 | 1572.93 |
| $[\text{Fe}^{\text{III}}_4\text{Fe}^{\text{II}}\text{O}_2(\text{dpbt})_4\text{Cl}_4+3\text{H}]^+$    | 0.325  | 1608.91 | 1608.91 |

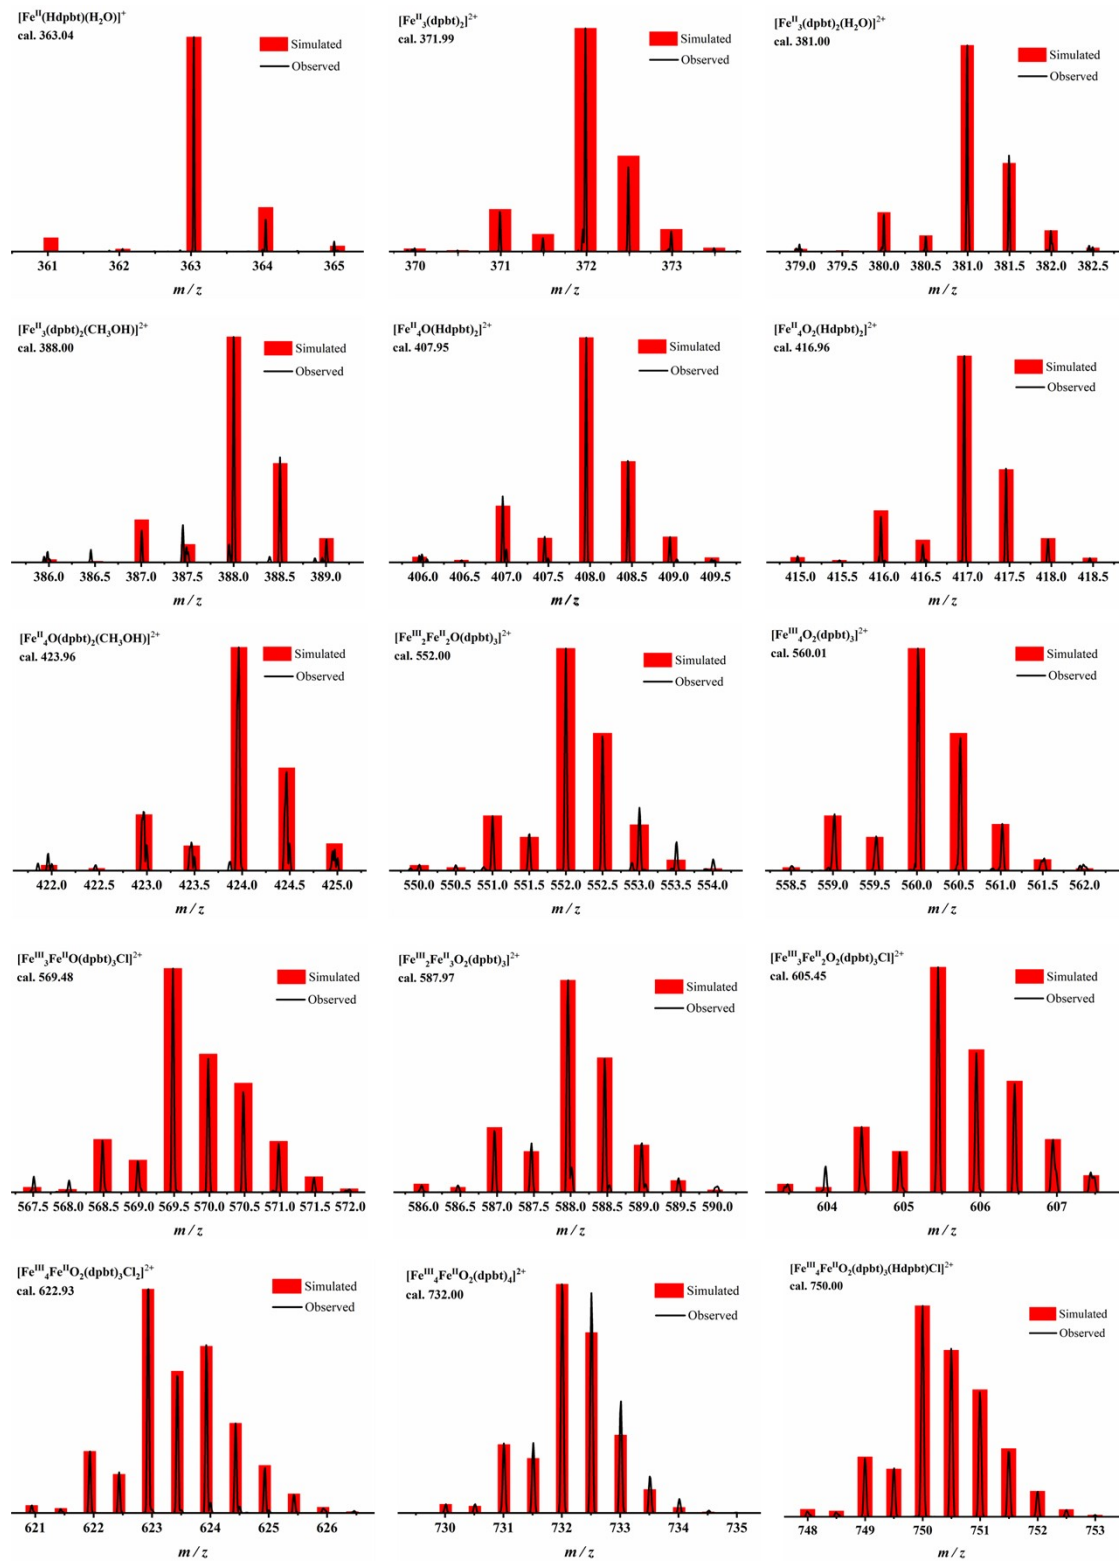

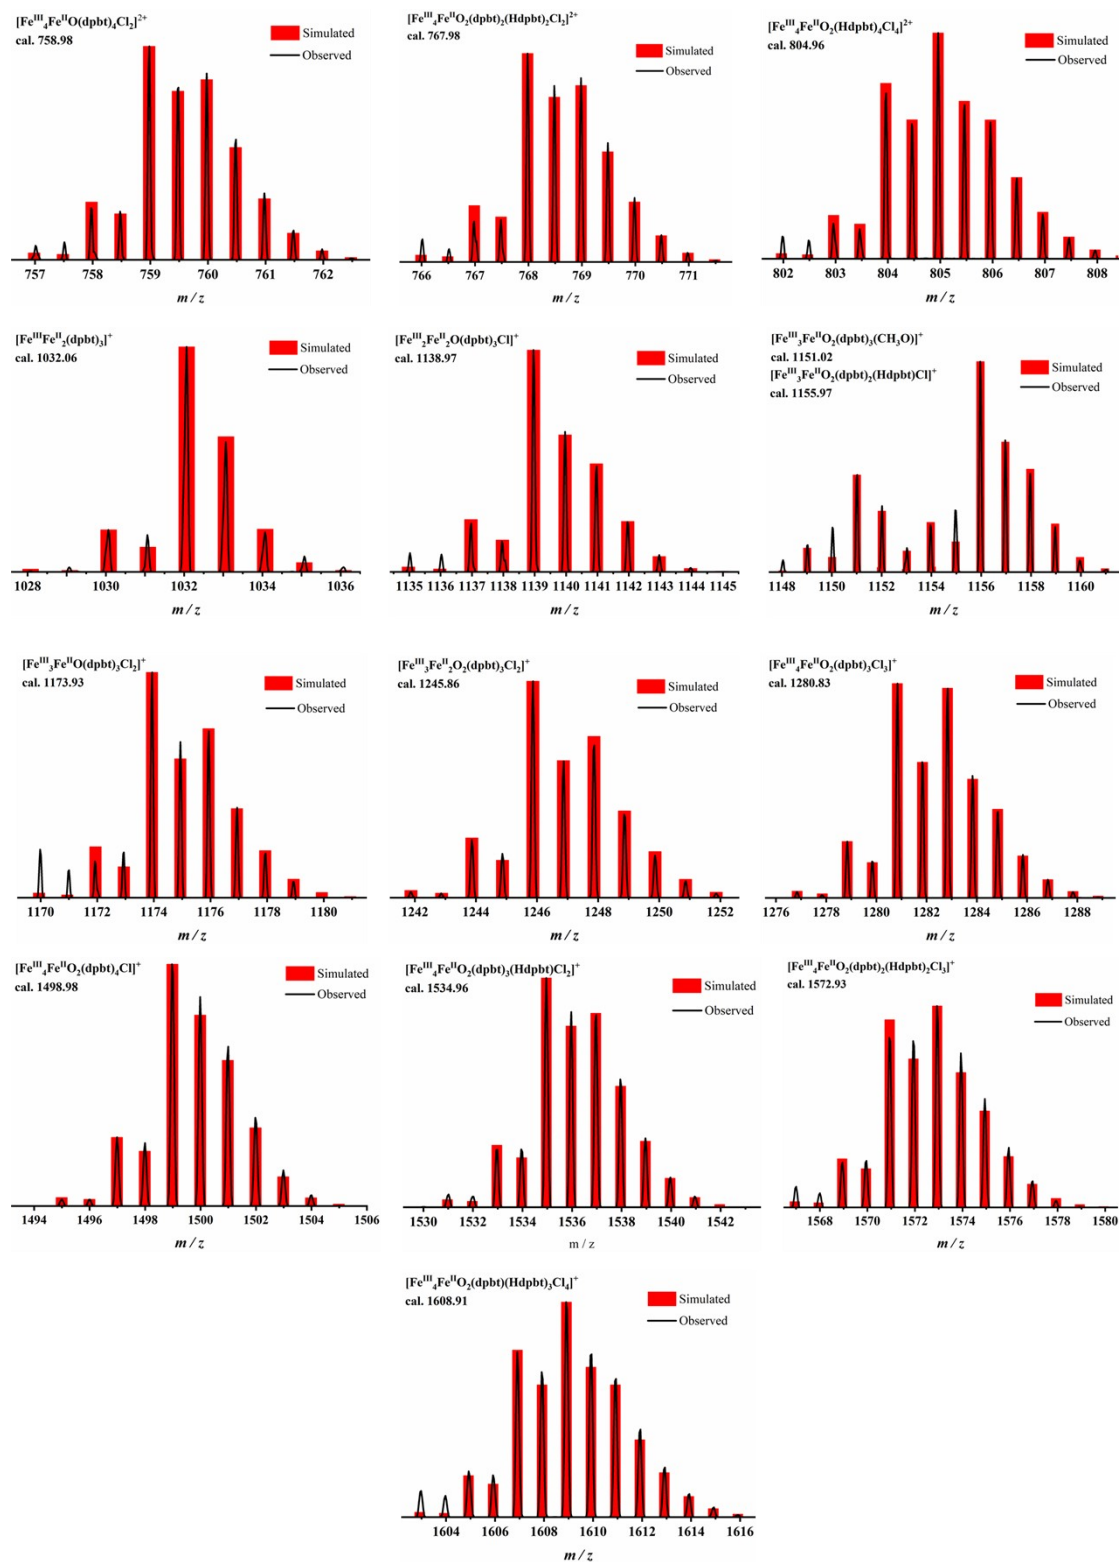

**Fig. S10** The superposed simulated and observed spectra of time-dependent HRESI-MS species for  $\{\text{Fe}_3\}$ -**0D** in positive mode.

**Table S4.** Time-dependent HRESI-MS spectra assigned in the HRESI-MS of {Fe<sub>3</sub>}-0D in positive mode.

| m/z     | Fragment                                                                                                                                | Relative Intensity |        |        |        |         |         |         |
|---------|-----------------------------------------------------------------------------------------------------------------------------------------|--------------------|--------|--------|--------|---------|---------|---------|
|         |                                                                                                                                         | 15 min             | 30 min | 60 min | 90 min | 120 min | 200 min | 300 min |
| 363.04  | [Fe <sup>II</sup> (Hdpbt)H <sub>2</sub> O] <sup>+</sup><br>(cal. 363.04)                                                                | 0.117              | 0.311  | 0.167  | 0.114  | 0.017   | 0.091   | 0       |
| 377.05  | [Fe <sup>II</sup> (Hdpbt)(CH <sub>3</sub> OH)] <sup>+</sup><br>(cal.377.06)                                                             | 0.244              | 0.138  | 0.105  | 0.023  | 0.015   | 0.018   | 0       |
| 381.00  | [Fe <sup>II</sup> (H <sub>2</sub> dpbt)Cl] <sup>+</sup><br>(cal.381.06)                                                                 | 1                  | 0.475  | 0.257  | 0.014  | 0.111   | 0.012   | 0       |
| 470.90  | [Fe <sup>II</sup> <sub>2</sub> (dpbt)Cl <sub>2</sub> ] <sup>+</sup><br>(cal.470.90)                                                     | 0.267              | 1      | 0.403  | 0.250  | 0.167   | 0.100   | 0       |
| 804.96  | [Fe <sup>III</sup> <sub>4</sub> Fe <sup>II</sup> O <sub>2</sub> (Hdpbt) <sub>4</sub> Cl <sub>4</sub> ] <sup>2+</sup><br>(cal.804.96)    | 0                  | 0.140  | 0.229  | 0.391  | 0.606   | 1       | 1       |
| 1032.06 | [Fe <sup>III</sup> Fe <sup>II</sup> <sub>2</sub> (dpbt) <sub>3</sub> ] <sup>+</sup><br>(cal. 1032.06)                                   | 0                  | 0.221  | 0.451  | 0.343  | 0.215   | 0.112   | 0       |
| 1138.97 | [Fe <sup>III</sup> <sub>4</sub> O(dpbt) <sub>3</sub> Cl] <sup>+</sup><br>(cal. 1138.97)                                                 | 0                  | 0.117  | 1      | 1      | 0.666   | 0.258   | 0       |
| 1155.96 | [Fe <sup>III</sup> <sub>3</sub> Fe <sup>II</sup> O <sub>2</sub> (dpbt) <sub>3</sub> Cl+H] <sup>+</sup><br>(cal. 1155.97)                | 0                  | 0.066  | 0.179  | 0.091  | 0.139   | 0.052   | 0       |
| 1173.93 | [Fe <sup>III</sup> <sub>3</sub> Fe <sup>II</sup> O(dpbt) <sub>3</sub> Cl <sub>2</sub> ] <sup>+</sup><br>(cal. 1173.93)                  | 0                  | 0.042  | 0.179  | 0.104  | 0.284   | 0.010   | 0       |
| 1245.85 | [Fe <sup>III</sup> <sub>3</sub> Fe <sup>II</sup> O <sub>2</sub> (dpbt) <sub>3</sub> Cl <sub>2</sub> ] <sup>+</sup><br>(cal. 1245.85)    | 0                  | 0.075  | 0.262  | 0.480  | 0.164   | 0.052   | 0       |
| 1280.83 | [Fe <sup>III</sup> <sub>4</sub> Fe <sup>II</sup> O <sub>2</sub> (dpbt) <sub>3</sub> Cl <sub>3</sub> ] <sup>+</sup><br>(cal. 1280.83)    | 0                  | 0.118  | 0.067  | 0.225  | 1       | 0.400   | 0       |
| 1608.91 | [Fe <sup>III</sup> <sub>4</sub> Fe <sup>II</sup> O <sub>2</sub> (dpbt) <sub>4</sub> Cl <sub>4</sub> +3H] <sup>+</sup><br>(cal. 1608.91) | 0                  | 0      | 0      | 0.006  | 0       | 0.046   | 0.274   |

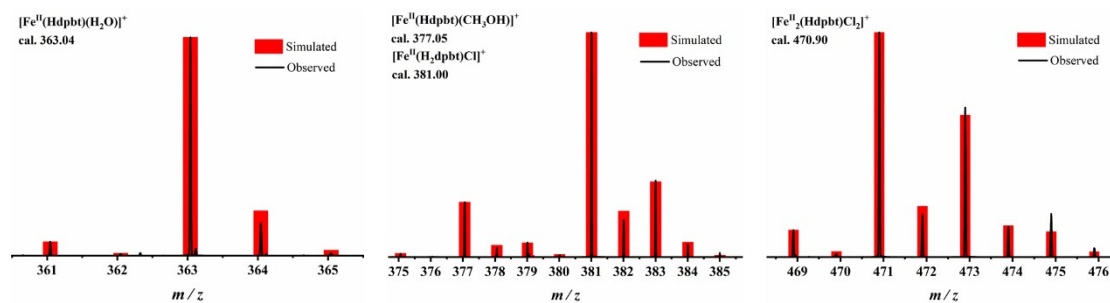

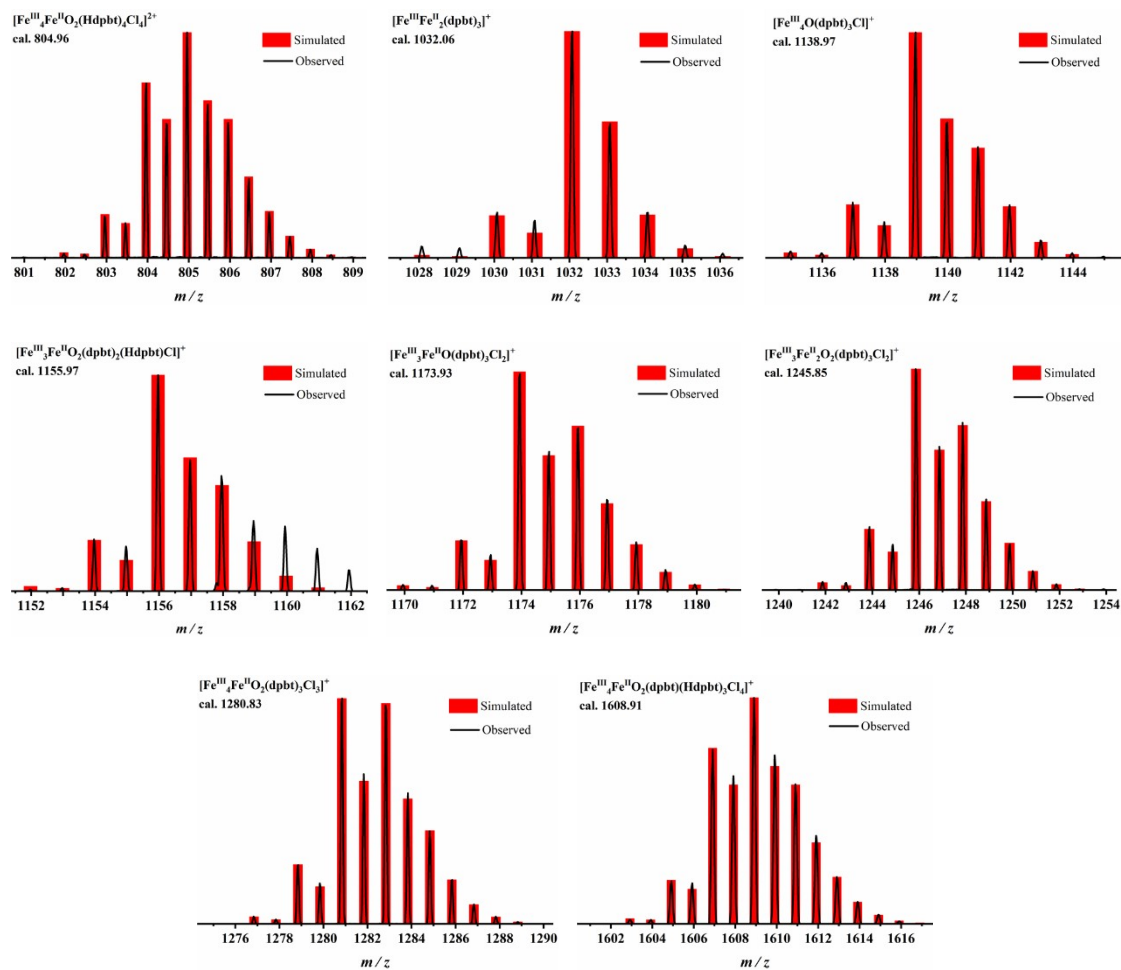

**Fig. S11** The superposed simulated and observed spectra of time-dependent HRESI-MS species for **{Fe<sub>3</sub>}-0D** in positive mode.

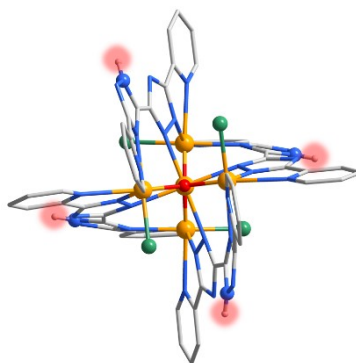

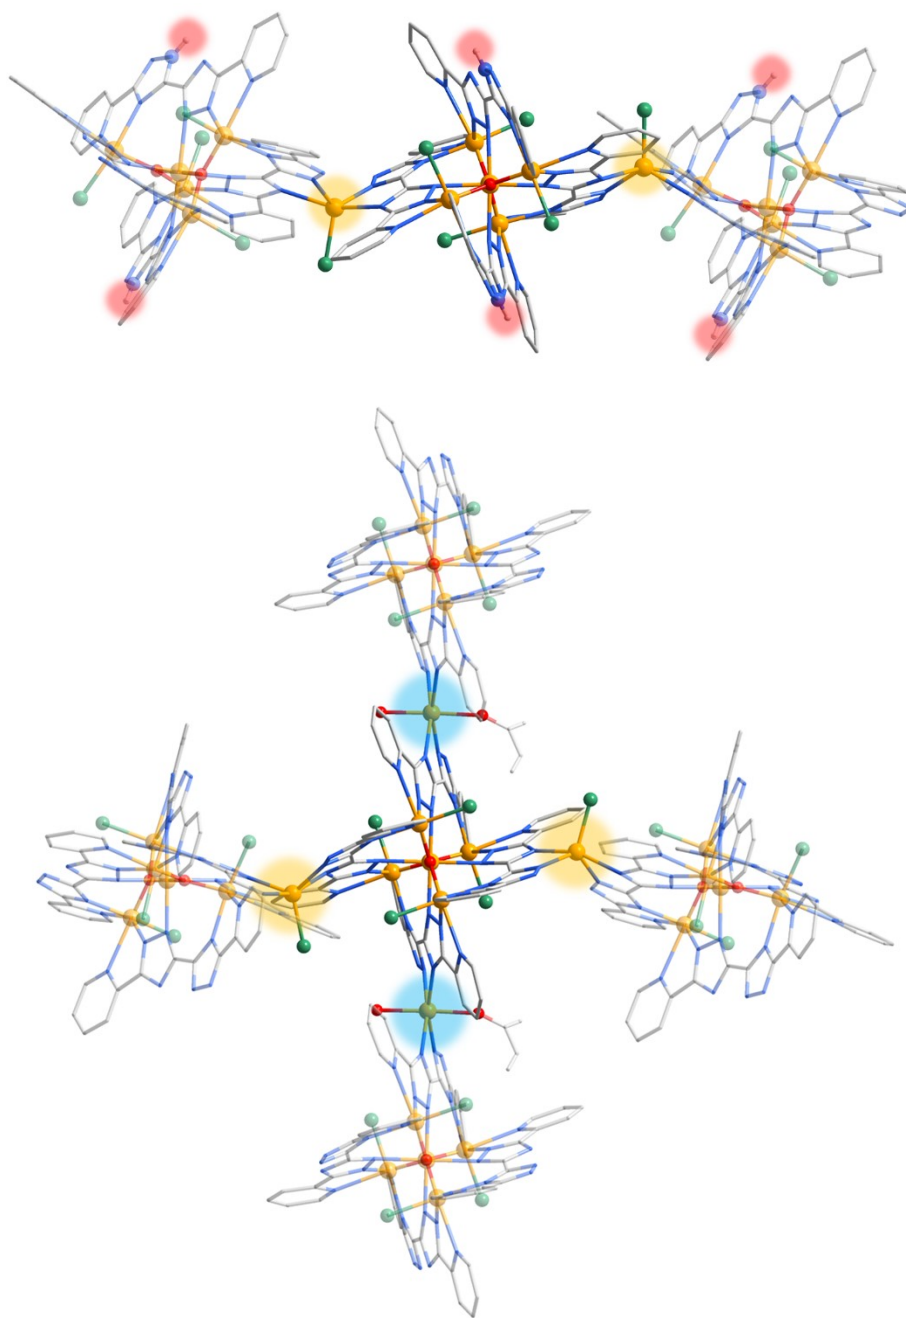

**Fig. S12** Schematic diagram of dimension expansion from  $\{\text{Fe}_5\}$ -0D to  $\{\text{Fe}_5\}$ -2D. (All non-NH hydrogen atoms, methanol molecule and  $\text{FeCl}_4^-$  anion are omitted for clarity.)

**Table S5.** Crystallographic data for  $\{\text{Fe}_5\}$ -0D,  $\{\text{Fe}_5\}$ -1D, and  $\{\text{Fe}_5\}$ -2D (Squeeze)

| Identification code | $\{\text{Fe}_5\}$ -0D                                                        | $\{\text{Fe}_5\}$ -1D                                                     | $\{\text{Fe}_5\}$ -2D                                                     |
|---------------------|------------------------------------------------------------------------------|---------------------------------------------------------------------------|---------------------------------------------------------------------------|
| Empirical formula   | $\text{C}_{56}\text{H}_{36}\text{Cl}_{12}\text{Fe}_7\text{N}_{32}\text{O}_6$ | $\text{C}_{56}\text{H}_{34}\text{Cl}_9\text{Fe}_7\text{N}_{32}\text{O}_2$ | $\text{C}_{58}\text{H}_{39}\text{Cl}_9\text{Fe}_8\text{N}_{32}\text{O}_4$ |
| Formula weight (M)  | 2005.52                                                                      | 1897.15                                                                   | 2014.06                                                                   |
| Crystal system      | triclinic                                                                    | monoclinic                                                                | monoclinic                                                                |
| Space group         | P-1                                                                          | $\text{P}2_1/\text{c}$                                                    | $\text{P}2_1/\text{n}$                                                    |
| a (Å)               | 16.9840(11)                                                                  | 17.9866(12)                                                               | 12.4532(2)                                                                |
| b (Å)               | 17.1651(11)                                                                  | 23.3546(12)                                                               | 23.4463(5)                                                                |



|                                    |                                  |                       |                       |
|------------------------------------|----------------------------------|-----------------------|-----------------------|
| c (Å)                              | 18.6317(11)                      | 21.3135(13)           | 34.7967(6)            |
| $\alpha$ (°)                       | 77.606(5)                        | 90                    | 90                    |
| $\beta$ (°)                        | 67.810(6)                        | 109.296(7)            | 95.1150(10)           |
| $\gamma$ (°)                       | 77.930(5)                        | 90                    | 90                    |
| V/( Å <sup>3</sup> )               | 4862.7(6)                        | 8450.2(9)             | 10119.5(3)            |
| Z                                  | 2                                | 4                     | 4                     |
| Dc( Mg m <sup>-3</sup> )           | 1.370                            | 1.491                 | 1.322                 |
| F(000)                             | 1996                             | 3780                  | 4016                  |
| Reflections                        | 39906/19855                      | 60576/17260           | 71258/23678           |
| collected/unique                   | R(int) = 0.0794                  | R(int) = 0.1204       | R(int) = 0.0418       |
| Goodness-of-fit on $F^2$           | 0.946                            | 1.009                 | 1.020                 |
| Final $R$ indices $I > 2\sigma(I)$ | $R_1 = 0.0778$                   | $R_1 = 0.0837$        | $R_1 = 0.0624$        |
|                                    | $\omega R_2 = 0.1776$            | $\omega R_2 = 0.1922$ | $\omega R_2 = 0.1438$ |
| R indices                          | $R_1 = 0.1433$                   | $R_1 = 0.1849$        | $R_1 = 0.0841$        |
|                                    | (all data) $\omega R_2 = 0.2173$ | $\omega R_2 = 0.2548$ | $\omega R_2 = 0.1544$ |

**Table S6.** Selected bond length and bond angle for {Fe<sub>5</sub>}-0D, {Fe<sub>5</sub>}-1D, and {Fe<sub>5</sub>}-2D

**{Fe<sub>5</sub>}-0D.**

**Atomic Distances [Å]**

|          |             |          |           |
|----------|-------------|----------|-----------|
| Fe1—O1   | 2.213 (4)   | Fe4—O2   | 1.830 (4) |
| Fe1—O2   | 2.189 (4)   | Fe4—N21  | 2.156 (6) |
| Fe1—N4   | 2.170 (6)   | Fe4—N24  | 2.221 (5) |
| Fe1—N14  | 2.208 (5)   | Fe4—N31  | 2.045 (5) |
| Fe1—N20  | 2.160 (5)   | Fe5—Cl3  | 2.306 (2) |
| Fe1—N30  | 2.203 (5)   | Fe5—O2   | 1.855 (4) |
| Fe2—Cl2  | 2.3169 (18) | Fe5—N5   | 2.176 (6) |
| Fe2—O1   | 1.833 (4)   | Fe5—N8   | 2.192 (5) |
| Fe2—N9   | 2.221 (5)   | Fe5—N15  | 2.048 (5) |
| Fe2—N10  | 2.151 (5)   | Fe5—N16  | 2.401 (5) |
| Fe2—N17  | 2.372 (5)   | Fe6—Cl5  | 2.187 (2) |
| Fe2—N19  | 2.062 (6)   | Fe6—Cl6  | 2.180 (3) |
| Fe3—Cl11 | 2.3126 (19) | Fe6—Cl7  | 2.178 (3) |
| Fe3—O1   | 1.862 (4)   | Fe6—Cl8  | 2.184 (3) |
| Fe3—N1   | 2.393 (5)   | Fe7—Cl9  | 2.189 (3) |
| Fe3—N3   | 2.061 (5)   | Fe7—Cl10 | 2.180 (3) |
| Fe3—N25  | 2.232 (5)   | Fe7—Cl11 | 2.161 (3) |
| Fe3—N26  | 2.157 (5)   | Fe7—Cl12 | 2.171 (3) |
| Fe4—Cl4  | 2.301 (2)   |          |           |

**Bond Angles [°]**

|             |             |             |             |
|-------------|-------------|-------------|-------------|
| O2—Fe1—O1   | 179.52 (16) | N25—Fe3—N1  | 82.05 (19)  |
| O2—Fe1—N14  | 90.23 (16)  | N26—Fe3—C11 | 165.15 (15) |
| O2—Fe1—N30  | 88.64 (17)  | N26—Fe3—N1  | 89.52 (18)  |
| N4—Fe1—O1   | 90.34 (18)  | N26—Fe3—N25 | 75.6 (2)    |
| N4—Fe1—O2   | 90.13 (18)  | O2—Fe4—C14  | 97.97 (14)  |
| N4—Fe1—N14  | 89.46 (19)  | O2—Fe4—N21  | 88.11 (19)  |
| N4—Fe1—N30  | 90.58 (19)  | O2—Fe4—N24  | 116.06 (18) |
| N14—Fe1—O1  | 89.89 (16)  | O2—Fe4—N31  | 91.95 (18)  |
| N20—Fe1—O1  | 88.58 (17)  | N21—Fe4—C14 | 166.83 (16) |
| N20—Fe1—O2  | 90.95 (17)  | N21—Fe4—N24 | 75.9 (2)    |
| N20—Fe1—N4  | 178.9 (2)   | N24—Fe4—C14 | 90.95 (16)  |
| N20—Fe1—N14 | 90.94 (19)  | N31—Fe4—C14 | 97.05 (15)  |
| N20—Fe1—N30 | 89.05 (19)  | N31—Fe4—N21 | 94.4 (2)    |
| N30—Fe1—O1  | 91.24 (17)  | N31—Fe4—N24 | 149.5 (2)   |
| N30—Fe1—N14 | 178.9 (2)   | Cl3—Fe5—N16 | 92.22 (14)  |
| Cl2—Fe2—N17 | 88.33 (13)  | O2—Fe5—Cl3  | 96.11 (14)  |
| O1—Fe2—Cl2  | 98.49 (12)  | O2—Fe5—N5   | 86.74 (18)  |
| O1—Fe2—N9   | 113.87 (19) | O2—Fe5—N8   | 114.32 (18) |
| O1—Fe2—N10  | 88.45 (17)  | O2—Fe5—N15  | 92.34 (18)  |
| O1—Fe2—N17  | 161.94 (18) | O2—Fe5—N16  | 163.34 (18) |
| O1—Fe2—N19  | 90.67 (19)  | N5—Fe5—Cl3  | 166.88 (15) |
| N9—Fe2—Cl2  | 89.96 (15)  | N5—Fe5—N8   | 76.0 (2)    |
| N9—Fe2—N17  | 82.7 (2)    | N5—Fe5—N16  | 88.41 (18)  |
| N10—Fe2—Cl2 | 164.87 (15) | N8—Fe5—Cl3  | 91.21 (18)  |
| N10—Fe2—N9  | 74.93 (19)  | N8—Fe5—N16  | 79.79 (18)  |
| N10—Fe2—N17 | 89.07 (18)  | N15—Fe5—Cl3 | 96.64 (16)  |
| N19—Fe2—Cl2 | 92.61 (15)  | N15—Fe5—N5  | 96.0 (2)    |
| N19—Fe2—N9  | 154.7 (2)   | N15—Fe5—N8  | 151.3 (2)   |
| N19—Fe2—N10 | 100.77 (19) | N15—Fe5—N16 | 72.33 (18)  |
| N19—Fe2—N17 | 72.23 (19)  | Cl6—Fe6—Cl5 | 109.13 (11) |
| Cl1—Fe3—N1  | 89.25 (13)  | Cl6—Fe6—Cl8 | 109.47 (12) |
| O1—Fe3—Cl1  | 97.50 (12)  | Cl7—Fe6—Cl5 | 109.61 (10) |
| O1—Fe3—N1   | 162.93 (18) | Cl7—Fe6—Cl6 | 110.28 (12) |
| O1—Fe3—N3   | 91.92 (19)  | Cl7—Fe6—Cl8 | 108.48 (14) |

|             |             |               |             |
|-------------|-------------|---------------|-------------|
| O1—Fe3—N25  | 113.53 (18) | Cl8—Fe6—Cl5   | 109.85 (13) |
| O1—Fe3—N26  | 87.85 (18)  | Cl10—Fe7—Cl9  | 110.30 (13) |
| N3—Fe3—Cl1  | 93.84 (15)  | Cl11—Fe7—Cl9  | 108.17 (12) |
| N3—Fe3—N1   | 71.9 (2)    | Cl11—Fe7—Cl10 | 110.07 (13) |
| N3—Fe3—N25  | 153.7 (2)   | Cl11—Fe7—Cl12 | 111.93 (14) |
| N3—Fe3—N26  | 99.83 (19)  | Cl12—Fe7—Cl9  | 108.22 (12) |
| N25—Fe3—Cl1 | 89.53 (16)  | Cl12—Fe7—Cl10 | 108.14 (13) |

**{Fe<sub>5</sub>}-1D. Symmetry codes: (A) -x+1, y-1/2, -z+3/2.**

#### Atomic Distances [Å]

|         |           |         |           |
|---------|-----------|---------|-----------|
| Fe1—O1  | 2.253 (5) | Fe4—O2  | 1.828 (5) |
| Fe1—O2  | 2.218 (5) | Fe4—N21 | 2.101 (6) |
| Fe1—N4  | 2.147 (7) | Fe4—N24 | 2.224 (7) |
| Fe1—N14 | 2.182 (6) | Fe4—N31 | 2.061 (7) |
| Fe1—N20 | 2.125 (7) | Fe4—N32 | 2.406 (7) |
| Fe1—N30 | 2.208 (6) | Fe5—Cl3 | 2.303 (3) |
| Fe2—Cl2 | 2.295 (3) | Fe5—O2  | 1.850 (5) |
| Fe2—O1  | 1.837 (5) | Fe5—N5  | 2.128 (7) |
| Fe2—N9  | 2.255 (7) | Fe5—N8  | 2.202 (7) |
| Fe2—N10 | 2.176 (7) | Fe5—N15 | 2.048 (7) |
| Fe2—N17 | 2.412 (8) | Fe6—Cl5 | 2.245 (3) |
| Fe2—N19 | 2.049 (6) | Fe6—N2A | 2.206 (7) |
| Fe3—Cl1 | 2.283 (3) | Fe6—N6A | 2.076 (7) |
| Fe3—O1  | 1.836 (5) | Fe6—N18 | 2.324 (7) |
| Fe3—N1  | 2.367 (7) | Fe6—N22 | 2.055 (7) |
| Fe3—N3  | 2.057 (7) | Fe7—Cl6 | 2.168 (4) |
| Fe3—N25 | 2.245 (7) | Fe7—Cl7 | 2.186 (4) |
| Fe3—N26 | 2.152 (7) | Fe7—Cl8 | 2.198 (4) |
| Fe4—Cl4 | 2.311 (2) | Fe7—Cl9 | 2.152 (5) |

#### Bond Angles [°]

|            |           |             |            |
|------------|-----------|-------------|------------|
| O2—Fe1—O1  | 178.8 (2) | N26—Fe3—N1  | 85.6 (2)   |
| N4—Fe1—O1  | 89.4 (2)  | N26—Fe3—N25 | 74.5 (3)   |
| N4—Fe1—O2  | 89.8 (2)  | Cl4—Fe4—N32 | 87.08 (19) |
| N4—Fe1—N14 | 90.4 (2)  | O2—Fe4—Cl4  | 99.98 (17) |
| N4—Fe1—N30 | 87.2 (2)  | O2—Fe4—N21  | 88.3 (2)   |
| N14—Fe1—O1 | 89.9 (2)  | O2—Fe4—N24  | 113.2 (2)  |

|             |             |             |             |
|-------------|-------------|-------------|-------------|
| N14—Fe1—O2  | 89.2 (2)    | O2—Fe4—N31  | 92.6 (2)    |
| N14—Fe1—N30 | 177.5 (2)   | O2—Fe4—N32  | 164.2 (3)   |
| N20—Fe1—O1  | 88.1 (2)    | N21—Fe4—C14 | 165.6 (2)   |
| N20—Fe1—O2  | 92.7 (2)    | N21—Fe4—N24 | 75.9 (3)    |
| N20—Fe1—N4  | 175.8 (2)   | N21—Fe4—N32 | 88.0 (3)    |
| N20—Fe1—N14 | 93.0 (2)    | N24—Fe4—C14 | 89.9 (2)    |
| N20—Fe1—N30 | 89.5 (2)    | N24—Fe4—N32 | 80.7 (3)    |
| N30—Fe1—O1  | 90.7 (2)    | N31—Fe4—C14 | 96.53 (19)  |
| N30—Fe1—O2  | 90.1 (2)    | N31—Fe4—N21 | 94.9 (3)    |
| Cl2—Fe2—N17 | 87.05 (18)  | N31—Fe4—N24 | 152.0 (3)   |
| O1—Fe2—Cl2  | 100.00 (17) | N31—Fe4—N32 | 72.5 (3)    |
| O1—Fe2—N9   | 114.3 (2)   | O2—Fe5—Cl3  | 100.54 (18) |
| O1—Fe2—N10  | 86.4 (2)    | O2—Fe5—N5   | 87.9 (2)    |
| O1—Fe2—N17  | 161.8 (3)   | O2—Fe5—N8   | 115.7 (2)   |
| O1—Fe2—N19  | 92.0 (2)    | O2—Fe5—N15  | 91.5 (2)    |
| N9—Fe2—Cl2  | 90.2 (2)    | N5—Fe5—Cl3  | 165.6 (2)   |
| N9—Fe2—N17  | 82.2 (3)    | N5—Fe5—N8   | 74.6 (3)    |
| N10—Fe2—Cl2 | 163.3 (2)   | N8—Fe5—Cl3  | 91.2 (2)    |
| N10—Fe2—N9  | 73.2 (3)    | N15—Fe5—Cl3 | 94.3 (2)    |
| N10—Fe2—N17 | 91.5 (2)    | N15—Fe5—N5  | 97.3 (3)    |
| N19—Fe2—Cl2 | 93.31 (19)  | N15—Fe5—N8  | 150.8 (3)   |
| N19—Fe2—N9  | 152.5 (3)   | Cl5—Fe6—N18 | 95.74 (19)  |
| N19—Fe2—N10 | 101.9 (3)   | N2A—Fe6—Cl5 | 102.65 (19) |
| N19—Fe2—N17 | 70.7 (3)    | N2A—Fe6—N18 | 157.5 (2)   |
| Cl1—Fe3—N1  | 90.87 (18)  | N6A—Fe6—Cl5 | 115.8 (2)   |
| O1—Fe3—Cl1  | 100.37 (18) | N6A—Fe6—N2A | 76.6 (3)    |
| O1—Fe3—N1   | 161.3 (2)   | N6A—Fe6—N18 | 107.0 (3)   |
| O1—Fe3—N3   | 92.4 (3)    | N22—Fe6—Cl5 | 122.9 (2)   |
| O1—Fe3—N25  | 111.2 (3)   | N22—Fe6—N2A | 83.7 (3)    |
| O1—Fe3—N26  | 87.1 (2)    | N22—Fe6—N6A | 120.8 (3)   |
| N3—Fe3—Cl1  | 95.09 (19)  | N22—Fe6—N18 | 75.4 (2)    |
| N3—Fe3—N1   | 71.5 (3)    | Cl6—Fe7—Cl7 | 110.08 (18) |
| N3—Fe3—N25  | 154.3 (3)   | Cl6—Fe7—Cl8 | 108.40 (18) |
| N3—Fe3—N26  | 97.5 (3)    | Cl7—Fe7—Cl8 | 109.91 (16) |
| N25—Fe3—Cl1 | 90.7 (2)    | Cl9—Fe7—Cl6 | 108.5 (2)   |

|             |           |             |           |
|-------------|-----------|-------------|-----------|
| N25—Fe3—N1  | 83.4 (3)  | Cl9—Fe7—Cl7 | 108.1 (2) |
| N26—Fe3—Cl1 | 165.1 (2) | Cl9—Fe7—Cl8 | 111.8 (2) |

{Fe<sub>5</sub>}-2D. Symmetry codes: (A)  $-x+3/2, y-1/2, -z+3/2$ ; (B)  $x-1, y, z$ .

#### Atomic Distances [Å]

|         |             |          |             |
|---------|-------------|----------|-------------|
| Fe1—O1  | 2.178 (2)   | Fe4—N32  | 2.432 (3)   |
| Fe1—O2  | 2.171 (2)   | Fe5—Cl3  | 2.2870 (11) |
| Fe1—N4  | 2.176 (3)   | Fe5—O2   | 1.856 (2)   |
| Fe1—N14 | 2.164 (3)   | Fe5—N5   | 2.116 (3)   |
| Fe1—N20 | 2.183 (3)   | Fe5—N8   | 2.218 (3)   |
| Fe1—N30 | 2.172 (3)   | Fe5—N15  | 2.049 (3)   |
| Fe2—Cl2 | 2.2969 (12) | Fe5—N16  | 2.436 (3)   |
| Fe2—O1  | 1.849 (2)   | Fe6—Cl5  | 2.2616 (17) |
| Fe2—N9  | 2.220 (3)   | Fe6—N12A | 2.094 (4)   |
| Fe2—N10 | 2.109 (3)   | Fe6—N13A | 2.227 (3)   |
| Fe2—N17 | 2.420 (3)   | Fe6—N28  | 2.083 (3)   |
| Fe2—N19 | 2.069 (3)   | Fe6—N29  | 2.340 (3)   |
| Fe3—Cl1 | 2.2963 (12) | Fe7—O3   | 2.120 (4)   |
| Fe3—O1  | 1.853 (2)   | Fe7—O4   | 2.140 (4)   |
| Fe3—N3  | 2.058 (3)   | Fe7—N2   | 2.272 (3)   |
| Fe3—N25 | 2.242 (3)   | Fe7—N6   | 2.155 (3)   |
| Fe3—N26 | 2.096 (3)   | Fe7—N18B | 2.272 (3)   |
| Fe4—Cl4 | 2.3090 (10) | Fe7—N22B | 2.161 (3)   |
| Fe4—O2  | 1.846 (2)   | Fe8—Cl6  | 2.157 (3)   |
| Fe4—N21 | 2.105 (3)   | Fe8—Cl7  | 2.153 (3)   |
| Fe4—N24 | 2.228 (3)   | Fe8—Cl8  | 2.140 (3)   |
| Fe4—N31 | 2.052 (3)   | Fe8—Cl9  | 2.180 (4)   |

#### Bond Angles [°]

|            |             |             |             |
|------------|-------------|-------------|-------------|
| O1—Fe1—N20 | 89.56 (10)  | N31—Fe4—Cl4 | 93.93 (9)   |
| O2—Fe1—O1  | 179.61 (10) | N31—Fe4—N21 | 98.75 (12)  |
| O2—Fe1—N4  | 90.80 (10)  | N31—Fe4—N24 | 152.33 (12) |
| O2—Fe1—N20 | 90.58 (10)  | N31—Fe4—N32 | 70.95 (11)  |
| O2—Fe1—N30 | 89.93 (10)  | Cl3—Fe5—N16 | 89.88 (9)   |
| N4—Fe1—O1  | 89.06 (10)  | O2—Fe5—Cl3  | 100.51 (8)  |
| N4—Fe1—N20 | 178.57 (11) | O2—Fe5—N5   | 87.96 (11)  |
| N14—Fe1—O1 | 90.84 (10)  | O2—Fe5—N8   | 114.49 (11) |

|             |             |               |             |
|-------------|-------------|---------------|-------------|
| N14—Fe1—O2  | 89.52 (10)  | O2—Fe5—N15    | 92.24 (11)  |
| N14—Fe1—N4  | 89.88 (11)  | O2—Fe5—N16    | 160.93 (11) |
| N14—Fe1—N20 | 90.51 (11)  | N5—Fe5—Cl3    | 165.87 (9)  |
| N14—Fe1—N30 | 179.44 (11) | N5—Fe5—N8     | 75.43 (11)  |
| N30—Fe1—O1  | 89.70 (10)  | N5—Fe5—N16    | 85.33 (12)  |
| N30—Fe1—N4  | 89.98 (11)  | N8—Fe5—Cl3    | 90.70 (9)   |
| N30—Fe1—N20 | 89.63 (11)  | N8—Fe5—N16    | 81.00 (11)  |
| Cl2—Fe2—N17 | 87.85 (10)  | N15—Fe5—Cl3   | 95.90 (9)   |
| O1—Fe2—Cl2  | 99.68 (9)   | N15—Fe5—N5    | 95.04 (12)  |
| O1—Fe2—N9   | 114.70 (12) | N15—Fe5—N8    | 150.82 (12) |
| O1—Fe2—N10  | 88.41 (11)  | N15—Fe5—N16   | 70.65 (12)  |
| O1—Fe2—N17  | 161.93 (12) | Cl5—Fe6—N29   | 98.88 (10)  |
| O1—Fe2—N19  | 92.07 (11)  | N12A—Fe6—Cl5  | 117.86 (12) |
| N9—Fe2—Cl2  | 90.77 (10)  | N12A—Fe6—N13A | 77.11 (12)  |
| N9—Fe2—N17  | 81.34 (12)  | N12A—Fe6—N29  | 101.05 (12) |
| N10—Fe2—Cl2 | 165.58 (9)  | N13A—Fe6—Cl5  | 101.73 (10) |
| N10—Fe2—N9  | 74.96 (13)  | N13A—Fe6—N29  | 157.50 (12) |
| N10—Fe2—N17 | 87.95 (12)  | N28—Fe6—Cl5   | 119.47 (12) |
| N19—Fe2—Cl2 | 93.15 (9)   | N28—Fe6—N12A  | 122.42 (14) |
| N19—Fe2—N9  | 151.87 (13) | N28—Fe6—N13A  | 86.79 (12)  |
| N19—Fe2—N10 | 98.50 (12)  | N28—Fe6—N29   | 75.21 (12)  |
| N19—Fe2—N17 | 71.00 (11)  | O3—Fe7—O4     | 172.71 (17) |
| O1—Fe3—Cl1  | 99.13 (9)   | O3—Fe7—N2     | 84.02 (13)  |
| O1—Fe3—N3   | 92.10 (11)  | O3—Fe7—N6     | 98.33 (15)  |
| O1—Fe3—N25  | 115.51 (12) | O3—Fe7—N18B   | 95.24 (14)  |
| O1—Fe3—N26  | 87.68 (12)  | O3—Fe7—N22B   | 85.56 (16)  |
| N3—Fe3—Cl1  | 94.04 (10)  | O4—Fe7—N2     | 90.28 (15)  |
| N3—Fe3—N25  | 150.88 (13) | O4—Fe7—N6     | 84.62 (14)  |
| N3—Fe3—N26  | 98.55 (12)  | O4—Fe7—N18B   | 82.05 (13)  |
| N25—Fe3—Cl1 | 90.64 (10)  | O4—Fe7—N22B   | 100.22 (17) |
| N26—Fe3—Cl1 | 165.47 (9)  | N6—Fe7—N2     | 75.81 (11)  |
| N26—Fe3—N25 | 74.82 (13)  | N6—Fe7—N18B   | 166.38 (14) |
| Cl4—Fe4—N32 | 89.54 (8)   | N6—Fe7—N22B   | 104.31 (12) |
| O2—Fe4—Cl4  | 99.68 (8)   | N18B—Fe7—N2   | 106.93 (11) |
| O2—Fe4—N21  | 88.34 (11)  | N22B—Fe7—N2   | 169.48 (15) |

|             |             |               |             |
|-------------|-------------|---------------|-------------|
| O2—Fe4—N24  | 114.06 (11) | N22B—Fe7—N18B | 75.50 (11)  |
| O2—Fe4—N31  | 92.41 (11)  | Cl6—Fe8—Cl9   | 110.28 (12) |
| O2—Fe4—N32  | 161.60 (11) | Cl7—Fe8—Cl6   | 107.83 (15) |
| N21—Fe4—Cl4 | 164.71 (9)  | Cl7—Fe8—Cl9   | 110.36 (19) |
| N21—Fe4—N24 | 75.26 (12)  | Cl8—Fe8—Cl6   | 111.68 (17) |
| N21—Fe4—N32 | 86.58 (12)  | Cl8—Fe8—Cl7   | 109.09 (18) |
| N24—Fe4—Cl4 | 89.55 (9)   | Cl8—Fe8—Cl9   | 107.62 (15) |
| N24—Fe4—N32 | 81.66 (11)  |               |             |

---



**Mask results for {Fe<sub>5</sub>}-0D, {Fe<sub>5</sub>}-1D, and {Fe<sub>5</sub>}-2D are as follows:**

**[Fe<sup>III</sup><sub>4</sub>Fe<sup>II</sup>O<sub>2</sub>Cl<sub>4</sub>(Hdpbt)<sub>4</sub>]·[Fe<sup>III</sup>Cl<sub>4</sub>]<sub>2</sub>·4.5MeOH ({Fe<sub>5</sub>}-0D)**

loop\_

```
_smtbx_masks_void_nr  
_smtbx_masks_void_average_x  
_smtbx_masks_void_average_y  
_smtbx_masks_void_average_z  
_smtbx_masks_void_volume  
_smtbx_masks_void_count_electrons  
_smtbx_masks_void_content
```

1 0.000 0.000 0.000 1477.5 165.9

That is, SQUEEZE gives 165.9 electrons/unit cell for the voids. If these electrons are all from MeOH (18e<sup>-</sup>), each unit cell has 165.9/18 ≈ 9 MeOH molecules, and each formula unit has 4.5 MeOH molecules (since Z = 2). So the suitable formula for this compound should be [Fe<sup>III</sup><sub>4</sub>Fe<sup>II</sup>O<sub>2</sub>Cl<sub>4</sub>(Hdpbt)<sub>4</sub>]·[Fe<sup>III</sup>Cl<sub>4</sub>]<sub>2</sub>·4.5MeOH

**{[Fe<sup>III</sup><sub>4</sub>Fe<sup>II</sup><sub>2</sub>O<sub>2</sub>Cl<sub>5</sub>(dpbt)<sub>2</sub>(Hdpbt)<sub>2</sub>]·(Fe<sup>III</sup>Cl<sub>4</sub>)·6MeOH}<sub>n</sub> ({Fe<sub>5</sub>}-1D)**

loop\_

```
_smtbx_masks_void_nr  
_smtbx_masks_void_average_x  
_smtbx_masks_void_average_y  
_smtbx_masks_void_average_z  
_smtbx_masks_void_volume  
_smtbx_masks_void_count_electrons  
_smtbx_masks_void_content
```

1 -0.118 0.250 0.049 1113.8 212.3 ?

2 -0.857 0.750 0.162 1113.8 209.4 ?

That is, SQUEEZE gives 421.7 electrons/unit cell for the voids. If these electrons are all from MeOH (18e<sup>-</sup>), each unit cell has 421.7/18 ≈ 23.4 MeOH molecules, and each formula unit has 6 MeOH molecules (since Z = 4). So the suitable formula for this compound should be {[Fe<sup>III</sup><sub>4</sub>Fe<sup>II</sup><sub>2</sub>O<sub>2</sub>Cl<sub>5</sub>(dpbt)<sub>2</sub>(Hdpbt)<sub>2</sub>]·(Fe<sup>III</sup>Cl<sub>4</sub>)·6MeOH}<sub>n</sub>

**{[Fe<sup>III</sup><sub>4</sub>Fe<sup>II</sup><sub>3</sub>O<sub>2</sub>Cl<sub>5</sub>(dpbt)<sub>4</sub>(H<sub>2</sub>O)<sub>1.5</sub>(MEK)<sub>0.5</sub>]·(Fe<sup>III</sup>Cl<sub>4</sub>)·8.5MeOH}<sub>n</sub> ({Fe<sub>5</sub>}-2D)**

loop\_

```
_smtbx_masks_void_nr  
_smtbx_masks_void_average_x  
_smtbx_masks_void_average_y  
_smtbx_masks_void_average_z  
_smtbx_masks_void_volume  
_smtbx_masks_void_count_electrons  
_smtbx_masks_void_content
```

1 -0.099 -0.404 0.401 3478.1 608.4 ?

That is, SQUEEZE gives 608.4 electrons/unit cell for the voids. If these electrons are all from MeOH (18e<sup>-</sup>), each unit cell has 608.4/18 = 33.8 MeOH molecules, and each formula unit has 8.5 MeOH molecules (since Z = 4). So the suitable formula for this compound should be {[Fe<sup>III</sup><sub>4</sub>Fe<sup>II</sup><sub>3</sub>O<sub>2</sub>Cl<sub>5</sub>(dpbt)<sub>4</sub>(H<sub>2</sub>O)<sub>1.5</sub>(MEK)<sub>0.5</sub>]·(Fe<sup>III</sup>Cl<sub>4</sub>)·8.5MeOH}<sub>n</sub>
